# Supplementary material
Source: publisher figshare collection journal article supplement (https://gsajournals.figshare.com/ndownloader/files/12298931)
Supplement: Supplementary file 1 [file 12298931]

## Sheet: Sheet1
Table S6: Differentially expressed genes in the sheep ileum using pairwise comparisons between birth and one week and one week and 8 weeks of age.
A: DE genes between birth and one week of age							B: DE genes between one week and 8 weeks of age
GENE_NAME	LOG_FC	P	FDR	AVG_COUNT_NEWBORN	AVG_COUNT_1WEEK		GENE_NAME	LOG_FC	P	FDR	AVG_COUNT_1WEEK	AVG_COUNT_8WEEK
ENSOARG00000013806	-7.36507	1.21599e-134	3.28975e-130	2125.67	11.6667		ENSOARG00000008862	4.12186	2.51e-76	3.39e-72	269.829	4596.35
ANKRD24	-3.67244	2.48741e-57	2.16837e-53	1988	141		ENSOARG00000026482	3.27557	3.87e-71	3.49e-67	247.952	3159.59
MELTF	-7.68342	3.20598e-57	2.16837e-53	21104.7	94		APOC3	-4.39966	2.29e-61	1.24e-57	1417.33	56
ENSOARG00000019229	-4.47182	1.46243e-37	4.94556e-34	297.824	11.9017		ENSOARG00000009138	-5.9664	6.46e-48	2.91e-44	4519	70.3333
PIGZ	-4.43371	3.60125e-37	1.08254e-33	3080.67	130.333		LYPD8	-2.91267	1.14e-47	4.4e-44	19362.3	2508
TMC7	2.71907	6.72146e-32	1.39879e-28	97	586.333		RBP2	-5.15725	5.36e-46	1.81e-42	1263.33	33
ENSOARG00000017559	-6.06595	3.02781e-30	5.85102e-27	1110	15		SLC9A3	-3.64548	2.21e-42	6.63e-39	1832.67	144.333
ENSOARG00000018703	4.76123	3.57402e-28	6.04322e-25	10.6667	253.667		ENSOARG00000012457	2.26911	2.28e-41	6.18e-38	1577.27	7320.97
APOC3	-3.7839	1.27469e-26	1.91587e-23	23006.3	1417.33		PTGIS	-2.53787	2.07e-39	5.08e-36	929.667	157.667
ENSOARG00000018781	-2.30197	1.41061e-25	2.00856e-22	903.402	166.147		ENSOARG00000026990	-3.38297	3.15e-36	6.56e-33	2226.33	209.333
PLIN3	-2.05593	4.97625e-25	6.41083e-22	1271.33	277		MYO7A	-3.29873	1.07e-32	2.07e-29	600	60.6667
DPEP1	2.21754	3.90366e-24	4.80043e-21	2078.75	8832.46		MFAP5	-2.12668	1.18e-30	1.99e-27	714.271	160.111
ENSOARG00000016726	3.95484	1.46343e-23	1.72137e-20	12.1804	168.234		NES	-2.50936	1.44e-29	2.3e-26	786	137.333
SLC16A13	-3.28121	1.79619e-23	2.02476e-20	475.333	44		PI16	-2.45455	2.78e-29	4.17e-26	280	50
ATP8B3	-2.17891	7.36124e-23	7.96604e-20	529.333	106.333		ENSOARG00000026131	-2.89261	1.4e-28	1.89e-25	872	111.667
SLCO4C1	3.48434	1.62638e-22	1.69231e-19	38.7788	393.203		ENSOARG00000008863	-4.55603	3.97e-27	5.11e-24	338.333	14
ENSOARG00000009361	-3.17035	3.77473e-22	3.6472e-19	221.195	22.2177		DGAT2	-3.28	1.73e-26	1.95e-23	302	30.3333
CLEC10A	3.08765	7.01983e-21	6.54877e-18	19	147		ENSOARG00000008560	-2.47431	4.07e-25	4.41e-22	2368.33	418
PEX11A	-4.00567	1.85878e-20	1.67625e-17	400.667	22.3333		S100G	-7.04394	7.07e-25	7.36e-22	6370.33	41
MYL7	-5.79099	4.65398e-20	3.81542e-17	1133.67	18		PDE8B	-2.01482	1.56e-24	1.56e-21	1111.48	269.047
SLC13A2	2.09552	4.81476e-20	3.83113e-17	1927.33	7353.33		ENSOARG00000025916	-3.25284	2.27e-24	2.2e-21	552.112	56.5743
ISG15	3.41099	5.03409e-20	3.89121e-17	18	167		FNDC1	-2.71671	3.31e-24	3.09e-21	730.333	109.667
SLC34A2	2.83324	1.2332e-19	9.017e-17	122.333	797.333		KRT17	-3.72512	3.53e-23	3.19e-20	507.578	37.3634
ENSOARG00000008517	-4.68996	2.27494e-19	1.61964e-16	984.667	36		LAMA5	-2.19116	4.3e-23	3.75e-20	2472.35	535.616
TFF2	-2.4173	2.3643e-19	1.64009e-16	158.667	25		RIPK4	-2.20106	8.36e-23	6.86e-20	320	68.6667
ENSOARG00000021030	2.26095	2.30383e-18	1.484e-15	86.3333	362.667		ENSOARG00000011945	-2.73191	1.99e-22	1.58e-19	1346.67	199
TENM1	-3.77698	2.52153e-18	1.58645e-15	276.667	18.3333		MATN4	-3.77498	2.9e-21	1.96e-18	196.667	14
KRT17	3.01501	3.74917e-18	2.30523e-15	70	507.578		CAPN6	-3.35625	3.68e-21	2.37e-18	240	23
SLC16A11	-2.0064	6.01224e-18	3.53598e-15	264.626	58.7899		FBN2	-2.92491	6.96e-21	4.38e-18	828	107.667
ENSOARG00000016920	-2.49985	5.90803e-17	3.26196e-14	3670.87	587.417		ACOT11	-2.20303	1.09e-20	6.54e-18	319.333	68.3333
ENSOARG00000015153	6.47466	7.89033e-16	4.1051e-13	13	1045		C1QTNF6	-2.22829	3.37e-19	1.98e-16	675	139
GLB1L3	-3.96688	2.11207e-15	1.05815e-12	1142.6	66.2702		SULT1B1	-2.13698	4.8e-19	2.76e-16	393	85.3333
ABCC2	-4.25044	2.28884e-15	1.12586e-12	1061.67	52		STRA8	-2.11725	6.58e-19	3.71e-16	271.667	61.6667
ENSOARG00000009458	-2.96606	4.08345e-15	1.97275e-12	4169	486.334		ENSOARG00000009762	2.78075	8.08e-19	4.46e-16	15.5891	104.349
ENSOARG00000020215	3.0549	4.88138e-15	2.27691e-12	15.2267	115.119		LAMA3	-2.01183	4.22e-18	2.04e-15	1789.33	438.333
CCL24	2.91629	1.27839e-14	5.66975e-12	117	751.333		CTGF	-2.21362	6.52e-18	3.04e-15	252.333	52.6667
CD244	2.04275	1.8006e-14	7.857e-12	93	346.333		NOTUM	-3.28025	9.69e-18	4.44e-15	157.667	15.6667
SLC26A11	-2.01271	2.5194e-14	1.0819e-11	1238.67	279.333		TM4SF4	-3.00969	1.45e-17	6.53e-15	420	49.3333
ENSOARG00000009674	-2.62814	3.62478e-14	1.48583e-11	3872.33	564		CLDN4	-2.14027	5.75e-17	2.32e-14	237.649	50.2094
CLEC9A	2.47923	1.04948e-13	4.11486e-11	51	253.667		GPC3	-2.16397	6.67e-17	2.65e-14	240.333	52.3333
ENSOARG00000001407	-6.04866	1.42242e-13	5.49746e-11	12095.3	166.667		SERPINF1	-2.38353	7.23e-17	2.84e-14	294.333	55
CDHR1	2.29695	1.47754e-13	5.63006e-11	71.3333	313.667		UGT2A3	-3.0827	2.86e-16	9.92e-14	315.667	35.6667
B4GALNT3	2.08961	1.72827e-13	6.49398e-11	74	283.667		SLC38A3	-2.04482	5.58e-16	1.86e-13	1289	308.667
DAB2	-2.32727	2.00212e-13	7.31964e-11	11141.3	2019		DUOX2	-3.31336	7.25e-16	2.39e-13	647.594	64.5194
GCAT	-2.35822	4.64799e-13	1.61214e-10	148.667	26.3333		ADAM12	-2.54395	7.51e-16	2.43e-13	263	44.3333
DDR1	-2.6076	1.25012e-12	3.9789e-10	4763.33	714.667		SLC30A10	-3.20542	2.08e-15	6.2e-13	207.667	21.6667
ENSOARG00000011490	2.38274	2.4191e-12	7.52258e-10	603.104	2828.07		ENSOARG00000009458	-3.88955	3.67e-15	1.03e-12	486.334	32
ART3	-2.32564	2.76849e-12	8.41558e-10	138.333	25		COL1A1	-2.34629	8.5e-15	2.23e-12	35506	6918.67
TSPAN1	2.7661	3.28626e-12	9.66374e-10	476.333	2949		FRAS1	-2.1805	2.46e-14	5.99e-12	98	21.3333
SLC27A6	-2.63017	3.33462e-12	9.70052e-10	1742.76	255.914		GTF2IRD1	-2.1853	3.75e-14	8.91e-12	939.666	205.333
ENSOARG00000015072	4.43723	4.22667e-12	1.20367e-09	37.307	736.522		COL1A2	-2.13426	5.62e-14	1.27e-11	33384	7541.33
FABP1	-3.93174	5.62029e-12	1.58387e-09	699.667	40.6667		LRRC66	-2.0919	6.63e-14	1.45e-11	910	211
PAPPA2	-2.26793	6.43502e-12	1.79477e-09	218.667	41.6667		ENSOARG00000007979	-2.11837	3.02e-13	5.92e-11	15436.3	3502.99
PLA1A	-2.16926	6.56849e-12	1.81331e-09	316	63.6667		SPOCK1	-2.62599	7.36e-13	1.37e-10	101.667	16
ENSOARG00000004700	-3.55356	6.65345e-12	1.81821e-09	12121.5	941.585		NOXO1	-2.09063	8.93e-13	1.63e-10	434.667	99.6667
ENSOARG00000020949	2.08484	6.7471e-12	1.82536e-09	46.7626	182.955		SPTSSB	-2.28304	9.15e-13	1.66e-10	193.333	35.6667
RARRES1	-2.40802	7.26207e-12	1.94523e-09	4599.33	796		ENSOARG00000000317	-2.073	1.56e-12	2.73e-10	266.333	61
GIMD1	-3.23435	7.48791e-12	1.98606e-09	113.667	10.6667		LCT	-5.55379	2.01e-12	3.41e-10	561.667	11.6667
ENSOARG00000013777	-2.01392	8.46732e-12	2.20264e-09	2949.4	657.196		XDH	2.8361	4.63e-12	7.16e-10	29.3333	208
C10orf99	2.78637	2.0265e-11	5.12381e-09	228.667	1285.67		LOXL4	-2.15081	5.77e-12	8.62e-10	77	17
ENSOARG00000014819	-4.2727	2.57979e-11	6.40308e-09	2286.08	112.186		MUC13	-2.27637	1.05e-11	1.47e-09	18395	3672.67
THRB	-2.32539	2.62004e-11	6.4089e-09	371	67		IGFBP2	-2.82715	1.32e-11	1.78e-09	211.333	29
SERPINF1	2.26207	2.78918e-11	6.67773e-09	67.3333	294.333		ENSOARG00000000857	4.58174	2.03e-11	2.59e-09	39.2295	894.412
HK2	2.33472	3.51133e-11	8.26047e-09	300.333	1397		ASPN	-2.11271	3.04e-11	3.8e-09	314.667	69.3333
AQP8	-3.68263	4.12534e-11	9.53906e-09	1992.16	147.131		CA13	-2.51299	3.5e-11	4.3e-09	202.333	33.6667
ENSOARG00000004593	-3.14095	4.62571e-11	1.05163e-08	25907.4	2692.77		ENSOARG00000002166	3.10186	4.03e-11	4.86e-09	10.8916	28.6502
CIDEC	-2.74953	4.9943e-11	1.10751e-08	447.667	60.3333		ACTA1	-3.11327	4.19e-11	5.02e-09	345.689	39.0011
ENSOARG00000007979	2.03099	5.15411e-11	1.13365e-08	4122.67	15436.3		AQP3	-2.03857	5.15e-11	6.05e-09	277	65
ENSOARG00000019343	2.24531	5.35592e-11	1.16854e-08	16.3405	68.8153		SLC26A3	-2.23828	5.39e-11	6.29e-09	2372	495
ITGB6	2.13402	7.38208e-11	1.58504e-08	155.667	627.333		ITGB6	-2.52066	1.89e-10	1.97e-08	627.333	107
APOB	-2.38168	7.64754e-11	1.62911e-08	72320	12798		PEG10	-2.02039	2.05e-10	2.11e-08	126.667	30.3333
ENSOARG00000002231	2.35204	7.7787e-11	1.6441e-08	333.667	1478.67		TMC7	-2.18199	5.76e-10	5.12e-08	586.333	126.667
HERC6	3.18287	7.85892e-11	1.64818e-08	24.9661	211.271		ACTG2	-2.94476	1.1e-09	9.24e-08	13737.3	1741.67
CREB3L3	-2.19371	9.19982e-11	1.89994e-08	3523.33	694.333		CPS1	-2.59171	1.5e-09	1.22e-07	8802	1438.33
ENSOARG00000001279	2.24834	9.42097e-11	1.91635e-08	184.947	764.895		HPN	-2.61066	1.51e-09	1.22e-07	163.333	26
BPI	2.60715	1.43696e-10	2.87967e-08	142	792.667		ENSOARG00000006980	2.11713	2.09e-09	1.61e-07	39	165.667
CTSV	-2.24855	1.95839e-10	3.86732e-08	2694.67	523.333		ANXA13	-2.49199	2.75e-09	2.03e-07	326	54.6667
ENSOARG00000016939	3.54609	2.92785e-10	5.69856e-08	151.179	1552.75		ENSOARG00000009143	4.44314	5.45e-09	3.77e-07	76.3546	1633.35
ENSOARG00000009708	2.5215	3.85977e-10	7.40584e-08	210.882	1084.49		NTS	-2.54834	6.15e-09	4.16e-07	674	111.333
COMP	2.10527	4.82629e-10	9.06739e-08	15	58.3333		PCP4	-2.9268	7.22e-09	4.75e-07	347.667	42
HIF3A	-4.33205	7.23941e-10	1.31446e-07	6097.67	272		SYT1	-2.21896	7.65e-09	5.02e-07	48.3721	10.0444
CEBPE	2.89303	7.35589e-10	1.32671e-07	12.3333	80		ENSOARG00000009916	-2.45557	9.38e-09	6.06e-07	233.667	42.3333
ENSOARG00000019055	-2.42602	1.2471e-09	2.13538e-07	874.755	147.313		ENSOARG00000002283	-2.81526	1.61e-08	9.73e-07	183.923	25.7084
ENSOARG00000009097	2.57571	1.2772e-09	2.14617e-07	144.667	798.333		CSF3R	-2.85118	2.47e-08	1.37e-06	198	27.3333
SCNN1A	-3.23948	1.26251e-09	2.14617e-07	1146	110.333		PLA1A	-2.04866	3.72e-08	1.94e-06	63.6667	15
ENSOARG00000004139	2.34494	1.30631e-09	2.18154e-07	56.6667	239.879		SLC34A3	-3.04377	4e-08	2.07e-06	195.433	23.0949
ENSOARG00000026131	-2.23206	1.40662e-09	2.33465e-07	4762.33	872		GNAT1	-2.41505	5.36e-08	2.66e-06	80.3333	14.6667
FAR2	-2.33894	1.57511e-09	2.56705e-07	774.667	139.667		ENSOARG00000016491	-2.00678	6.98e-08	3.37e-06	100.971	23.6262
PLEKHG7	-2.84094	1.72652e-09	2.76022e-07	252.453	32.5808		CLCA4	-2.23123	1.17e-07	5.26e-06	27967	5820
FAIM2	-2.14772	1.89833e-09	2.96864e-07	190.667	39.3333		ENSOARG00000001451	3.06485	1.29e-07	5.73e-06	19.0539	159.045
MS4A15	3.25065	2.27527e-09	3.41973e-07	10.6667	88.3333		ENSOARG00000010490	-2.15422	3.06e-07	1.2e-05	53.6667	11.6667
CTLA4	2.57203	2.50184e-09	3.73949e-07	12.6667	69		APOB	-2.27951	3.08e-07	1.2e-05	12798	2633.33
CXCL9	3.83943	2.58648e-09	3.84476e-07	21.3333	313.667		LDB3	-2.14083	4.31e-07	1.61e-05	98.6667	22
IGF2R	-2.0261	3.27258e-09	4.68447e-07	11306.3	2539.33		CIDEC	-2.21344	6.17e-07	2.18e-05	60.3333	12.6667
CCL5	2.30381	3.33366e-09	4.74679e-07	79.3333	321.667		DES	-2.09697	6.97e-07	2.42e-05	6875.44	1588.5
GALNT13	-2.06956	4.08996e-09	5.67435e-07	267.577	58.6194		ADAMTS19	-2.23156	8.62e-07	2.92e-05	50	10.3333
ENSOARG00000009129	2.41217	4.44699e-09	6.13821e-07	27.3333	132		ENSOARG00000018341	-5.28994	9.37e-07	3.14e-05	666	14.6667
CAPN8	2.63238	4.71199e-09	6.39079e-07	13.6667	78		DUSP27	-2.21571	1.46e-06	4.59e-05	86.3333	18.3333
SERPINA5	-3.46984	4.72447e-09	6.39079e-07	1242.33	102.667		SFRP2	-2.17046	1.48e-06	4.63e-05	56	12
ENSOARG00000015358	3.31147	4.98633e-09	6.67823e-07	103.724	930.272		HIF3A	-2.2115	2.43e-06	7.1e-05	272	59.3333
TRPM6	-2.10033	7.06432e-09	9.05773e-07	346.667	73.6667		APOA1	-2.41799	5.02e-06	0.00013201	13996	2571.67
PIGR	4.2637	7.22019e-09	9.21392e-07	286	4942.33		ENSOARG00000006768	2.15273	6.09e-06	0.000155812	16.3333	72
ENSOARG00000002036	2.31692	8.36073e-09	1.04718e-06	67	280.667		CUBN	-2.82483	6.69e-06	0.000168778	2486.66	351.333
ENSOARG00000017928	2.6181	8.89832e-09	1.10429e-06	24.6667	137.667		PLIN4	-2.23515	1.33e-05	0.000301327	148.333	31
HPN	-2.72855	1.07483e-08	1.29814e-06	1184	163.333		ENSOARG00000000034	-2.28006	1.34e-05	0.000301794	122.667	28
ENSOARG00000023519	2.74009	1.19479e-08	1.41623e-06	26	170		ENSOARG00000006387	2.23501	1.55e-05	0.000338886	11.6667	54.6667
BATF2	2.78748	1.30951e-08	1.51399e-06	32	193.333		ENSOARG00000001407	-3.12238	1.66e-05	0.000359143	166.667	17.6667
ENSOARG00000015432	3.14728	1.67948e-08	1.90111e-06	51.3333	416.333		CHRNA3	-2.14415	2.47e-05	0.000501567	49.6667	11
SYNE4	2.46698	1.69422e-08	1.90189e-06	33.2673	163.722		ENSOARG00000018868	-2.00542	2.5e-05	0.000506001	49.5871	12.107
ENSOARG00000026965	-2.17671	1.89262e-08	2.08142e-06	240.652	46.8257		ENSOARG00000004888	-5.41563	2.52e-05	0.000509079	878.333	19.3333
IDO1	4.17614	2.01825e-08	2.21059e-06	88.1078	1466.77		ENSOARG00000012343	2.15012	2.6e-05	0.000521875	11	47.6667
SULT1E1	-2.2658	2.35658e-08	2.50019e-06	361.454	69.3921		ENSOARG00000004880	-5.01921	3.42e-05	0.000656926	438	12.6667
RHOV	2.00438	2.91957e-08	3.06147e-06	11.6667	41.3333		FABP2	-2.11079	4.12e-05	0.000765334	14709.3	4154
ENSOARG00000017006	2.15013	3.03498e-08	3.15802e-06	593.487	2278.92		ENSOARG00000002076	-2.94621	5.42e-05	0.000972361	158.372	20.0074
TRDC	2.15387	3.32667e-08	3.40908e-06	199.333	782.667		POPDC2	-2.20464	5.51e-05	0.000984823	61.3333	13
PI3	2.97847	3.82426e-08	3.86051e-06	310.333	2139		ENSOARG00000001857	2.00267	6.66e-05	0.00115024	1690.87	6534.82
CXCL10	2.06039	4.53814e-08	4.44836e-06	139.667	481.667		MEP1A	-2.33389	0.000110613	0.0017603	835.794	165.195
AHNAK2	-2.2953	4.55798e-08	4.45168e-06	1122.47	207.484		HSPA6	2.35943	0.000240443	0.00330033	40.6667	204.333
TF	-2.22885	5.38236e-08	5.14539e-06	1889.33	374.667		CLEC4E	2.41368	0.000277372	0.00369474	15	76
ENSOARG00000013725	-2.35436	5.91968e-08	5.5608e-06	79.3333	14		DUOXA2	-2.45874	0.00029887	0.00392887	74.0208	12.952
UGT2A3	-2.04721	6.49114e-08	6.01409e-06	1429.67	315.667		CYP1A1	2.69149	0.000339027	0.00432439	10.3333	65.3333
ASPDH	-2.09689	6.76209e-08	6.2374e-06	73.6667	15.3333		APOA4	-3.99636	0.000452278	0.00546735	1887.67	118.667
ENSOARG00000006442	2.36259	7.96148e-08	7.18226e-06	2734.28	11234.7		ENSOARG00000000407	-4.31938	0.000574483	0.00666016	1304.17	63.1593
ENSOARG00000000912	-3.24416	8.02027e-08	7.18891e-06	713.667	69.6667		ENSOARG00000004667	-2.16818	0.000607469	0.00692695	525.184	113.45
CYP4B1	2.19229	8.40748e-08	7.43517e-06	28.3333	118.667		ENSOARG00000020393	-2.40694	0.000806486	0.00868875	1772.78	513.028
ENSOARG00000018691	2.24876	8.44431e-08	7.44145e-06	16.4423	71.4462		ENSOARG00000018343	-2.71067	0.000821215	0.00880236	343	44.6667
C15orf48	2.96361	1.06799e-07	9.11461e-06	80.6667	514.667		CCDC180	-2.93664	0.00117987	0.011757	77.1594	20.6442
CXCR6	2.01101	1.34757e-07	1.12176e-05	65	236		ENSOARG00000015451	-2.09341	0.00152889	0.014347	282.003	65.6153
ENSOARG00000014375	2.67224	1.72144e-07	1.38196e-05	19.3333	106.667		ENSOARG00000016213	-2.29811	0.00290638	0.0237652	485.667	96.6667
SHROOM1	-2.65379	1.90121e-07	1.50396e-05	517.667	75.3333		SDSL	2.07248	0.00582141	0.0406642	38.7443	160.754
MGAM	2.3511	1.97859e-07	1.54991e-05	407.763	1839.67		ENSOARG00000021035	2.87866	0.00605389	0.0419416	16.0118	112.184
PCK1	-4.20861	1.98569e-07	1.54991e-05	2090.33	103
LMNTD2	-2.15579	2.35026e-07	1.78106e-05	72.6667	14.6667
ENSOARG00000004815	2.03779	2.61939e-07	1.95759e-05	58.7144	218.4
PIK3C2G	-3.18851	3.18129e-07	2.34514e-05	130.667	13
GBP5	2.25948	3.24174e-07	2.37675e-05	124	541.667
CRTAM	2.02236	4.04709e-07	2.91197e-05	22.6667	84.3333
H19_1	-2.71608	5.68293e-07	3.98305e-05	271.667	35
CTSL	-3.40924	1.07275e-06	7.07855e-05	535	49
SULT2A1	-2.35248	1.15167e-06	7.52593e-05	1116	197.667
NOS2	4.73745	1.25023e-06	8.09177e-05	33.6667	787
ENSOARG00000009474	2.55199	1.41578e-06	9.05496e-05	2404.33	12372
IFIT2	2.01115	1.7573e-06	0.000109544	76	275.065
CD96	2.03137	2.20275e-06	0.000133318	52.3333	194
PLA2G7	-2.21859	2.30958e-06	0.000139472	2738.67	542.333
MEP1A	-3.27617	2.44739e-06	0.000147137	8859.06	835.794
CLNK	2.33502	2.56851e-06	0.000153058	16.3333	73
CCR9	2.00119	2.63892e-06	0.000155203	29.3333	105.333
C6orf222	3.10431	2.93035e-06	0.000167961	39.3333	297
CCDC180	-4.32953	3.28376e-06	0.00018512	1264.21	77.1594
AFP	-4.48598	3.51185e-06	0.000195091	7630.81	305.042
ALOX15	2.35466	5.13251e-06	0.000272265	23.6667	108
SLC34A3	-2.14359	5.98444e-06	0.000310754	946.782	195.433
ENSOARG00000017970	2.08151	1.01636e-05	0.000499937	30.3333	115
KRT16	2.12469	1.02072e-05	0.000501171	123.518	478.679
SERPINE3	-2.89729	1.21192e-05	0.000583406	132.333	16
ENSOARG00000010690	-2.20474	1.741e-05	0.000791615	165.549	32.612
ENSOARG00000020338	2.55125	2.04851e-05	0.000911517	7695.33	41063
RSAD2	2.14421	2.11834e-05	0.000933382	13.6667	55.3333
TBC1D4	-2.33603	2.13198e-05	0.00093634	1813.67	329.333
ENSOARG00000001535	3.18742	2.23404e-05	0.000968584	24.0382	196.725
ENSOARG00000011057	-2.00111	3.9238e-05	0.00157968	122	27.6667
ENSOARG00000015398	2.14099	5.74192e-05	0.00216053	881.361	3595.54
FABP6	2.4765	6.38864e-05	0.00236071	2619.67	12288.3
CCL8	2.05998	6.46116e-05	0.00237824	24.3333	89.6667
LCT	-2.79515	8.39581e-05	0.00293843	4251.33	561.667
ENSOARG00000013263	2.21467	9.05811e-05	0.00311625	20.1165	81.7331
CES4A	-2.99391	9.27811e-05	0.00318137	221.342	31.5935
ENSOARG00000001633	-2.2386	0.000125238	0.00405772	153.661	29.2861
APOA4	-3.07251	0.000126831	0.00408973	17850.7	1887.67
ENSOARG00000016314	3.21496	0.000137184	0.00436631	49.4337	401.434
ENSOARG00000019163	2.80077	0.000142461	0.0045025	10.6667	68.3333
ENSOARG00000020975	2.08121	0.000221296	0.00647251	13.6667	51.6667
ENSOARG00000008942	-2.36362	0.000221301	0.00647251	1594.1	283.887
ENSOARG00000002076	2.71033	0.000241048	0.00698962	27.1508	158.372
SLC30A3	-2.09225	0.00025348	0.00725677	72.3333	15.3333
SCTR	-2.54074	0.00034929	0.00937468	153	23.3333
ENSOARG00000018341	4.06023	0.00041592	0.010914	45.3333	666
ENSOARG00000014451	2.56671	0.000443947	0.0115044	21.8825	114.179
ENSOARG00000001471	-2.39078	0.000446612	0.0115517	329	57
ENSOARG00000014843	-2.23774	0.00045086	0.0116278	116.584	23.4808
F10	-2.73453	0.000461778	0.0118417	259.667	36.3333
C1orf186	2.22466	0.00059673	0.0143885	35	139.333
TMPRSS15	-3.38149	0.000622295	0.0148686	2905.33	252
ENSOARG00000010572	4.16263	0.00079812	0.0180237	105.235	1679.98
ENSOARG00000002107	2.1375	0.000824672	0.0184997	62.9285	257.885
ENSOARG00000005549	5.94517	0.000974328	0.0212293	47.5052	2679.17
ENSOARG00000015707	2.47097	0.000975899	0.0212405	1162.52	2916.45
PADI4	2.02381	0.000995174	0.0214529	13	47.3333
ENSOARG00000014592	2.11712	0.00130128	0.0267718	44.3333	160
DEFB1	-2.38699	0.00131601	0.0269804	72	11
